## Genome analysis

# gpart: human genome partitioning and visualization of high-density SNP data by identifying haplotype blocks

Sun Ah Kim<sup>1</sup>, Myriam Brossard<sup>2</sup>, Delnaz Roshandel<sup>3</sup>,  
Andrew D. Paterson<sup>3,4</sup>, Shelley B. Bull<sup>2,4</sup> and Yun Joo Yoo<sup>5,6,\*</sup>

<sup>1</sup>The Research Institute of Basic Sciences, Seoul National University, Seoul 08826, South Korea, <sup>2</sup>Prosserman Centre for Health Research, The Lunenfeld-Tanenbaum Research Institute, Sinai Health System, Toronto, ON M5T 3L9, Canada, <sup>3</sup>Genetics and Genome Biology, The Hospital for Sick Children, Toronto, ON M5G 0A4, Canada, <sup>4</sup>Division of Biostatistics, Dalla Lana School of Public Health, University of Toronto, Toronto, ON M5T 3M7, Canada, <sup>5</sup>Department of Mathematics Education and <sup>6</sup>Interdisciplinary Program in Bioinformatics, Seoul National University, Seoul 08826, South Korea

\*To whom correspondence should be addressed.  
Associate Editor: Alfonso Valencia

Received on December 3, 2018; revised on March 30, 2019; editorial decision on April 22, 2019; accepted on April 25, 2019

## Abstract

**Summary:** For the analysis of high-throughput genomic data produced by next-generation sequencing (NGS) technologies, researchers need to identify linkage disequilibrium (LD) structure in the genome. In this work, we developed an R package *gpart* which provides clustering algorithms to define LD blocks or analysis units consisting of SNPs. The visualization tool in *gpart* can display the LD structure and gene positions for up to 20 000 SNPs in one image. The *gpart* functions facilitate construction of LD blocks and SNP partitions for vast amounts of genome sequencing data within reasonable time and memory limits in personal computing environments.

**Availability and implementation:** The R package is available at <https://bioconductor.org/packages/gpart>.

**Contact:** [yyoo@snu.ac.kr](mailto:yyoo@snu.ac.kr)

**Supplementary information:** [Supplementary data](#) are available at *Bioinformatics* online.

## 1 Introduction

In recent genome wide association studies (GWAS) and population genetic studies, researchers increasingly investigate dense single nucleotide polymorphism (SNP) data produced by new sequencing technologies (Kilpinen and Barrett, 2013). To reduce the dimension of high-throughput genomic data for genetic association analysis or to find evidence for population genetic phenomenon, one can utilize genomic linkage disequilibrium (LD) structure, especially LD blocks (or haplotype blocks).

The development of algorithms and software to identify the LD blocks from SNP genotype data mostly occurred before the era of deep sequencing technology. To determine the LD blocks, Gabriel *et al.* (2002) proposed a method based on estimation of the confidence

interval of  $D'$ . Zhang *et al.* (2002, 2003) developed a dynamic programming algorithm to detect common haplotypes in a block. Wang *et al.* (2002) proposed an approach using a four-gamete test. Barrett (2005) proposed the Solid Spine method which finds blocks based on the strong LD with markers at the block boundary, and Pattaro *et al.* (2008) developed a method based on an MCMC algorithm. As reported in Kim *et al.*, (2018), the previous methods and definitions for LD blocks (Gabriel *et al.*, 2002; Pattaro *et al.*, 2008; Wang *et al.*, 2002) do not serve well to identify long range LD blocks in sequencing data such as available in the 1000 Genomes Project. We previously proposed a new method of LD block construction called Big-LD (Kim *et al.* 2018), using graph-based clustering techniques. We showed that Big-LD produces larger size blocks, achieves better optimization in terms of LD strength

within and across LD blocks, and agrees better with recombination hotspots, compared to existing approaches such as methods implemented in Haploview (Barrett, 2005; Gabriel et al., 2002; Wang et al., 2002) or related methods (Pattaro et al., 2008; Taliun et al., 2014, 2016).

In this R/Bioconductor implementation `gpart`, we provide a new SNP partitioning method based on not only LD block structures but also on gene positions, together with a visualization tool to display a LD heatmap with LD block partitioning information and gene positions. The algorithm GPART uses an updated version of Big-LD which can deal with both  $r^2$  and  $D'$  LD measures and has improved speed and memory efficiency for construction of LD blocks by means of a new heuristic algorithm.

## 2 Implementation and main functions

The R package `gpart` provides three main functions, `BigLD`, `GPART`, `LDblockHeatmap`; and is available at the Bioconductor repository (<https://bioconductor.org/packages/gpart>). The package contains a vignette with detailed explanation about the functions and their options, illustrated by various examples and figures.

### 2.1 Updated version of Big-LD

Big-LD is a method to identify LD blocks using SNPs (Kim et al., 2018). The results of the Big-LD algorithm can be obtained using the `BigLD` function in the `gpart` package. In `gpart`, the Big-LD algorithm adopts an updated version of the published CLQ algorithm (Kim et al., 2018) that finds LD bins using the newly added heuristic algorithm (`near-nonhrst` algorithm, detailed in [Supplementary Methods](#)) which has been extended to account for both LD measures ( $r^2$  and  $D'$ ). Although the new heuristic algorithm is not as fast as the existing heuristic CLQ algorithm (`fast` algorithm), it returns results more similar to those obtained by the non-heuristic CLQ algorithm in a reasonable time ([Supplementary Table S1](#)). Users can choose a CLQ mode (`maximal/density`) and heuristic algorithm (`nonhrst/fast/near-nonhrst`) depending on their research aim or computational environment (see [Supplementary Results](#), [Supplementary Tables S2 and S3](#)). We apply `BigLD` to 1000 Genomes Project phase 3 data for  $MAF > 5\%$  ([Supplementary Table S4](#)) and to a GWAS dataset ([Supplementary Table S5](#)) (Roshandel et al., 2018).

### 2.2 GPART: SNP partitioning method

We developed a SNP partitioning algorithm, GPART, which partitions sets of contiguous SNPs into blocks using the Big-LD results combined with gene position information. Big-LD considers only LD structure within the given data; therefore depending on the LD, the results can include a large number of singleton SNPs or extremely large LD blocks. According to the purpose of downstream analysis, it can be appropriate to limit the number of SNPs in each block to increase analytical effectiveness. The GPART algorithm partitions an entire set of SNPs in a specified region so that all blocks satisfy specified minimum and maximum size limits, where size refers to a number of SNPs.

The function `GPART` provides two different method types, a gene-based method (`geneBased`) and an LDblock-based method (`LDblockBased`). The gene-based method first fuses gene position information and Big-LD blocks, then splits or merges blocks that do not meet pre-defined size criteria. The LDblock-based method splits large LD blocks to satisfy the pre-defined size criteria and first takes them as new blocks. Then it merges the remaining consecutive small-sized LD blocks into new blocks of at least the minimum size. In this merging stage, as many small LD blocks as possible can be merged if the

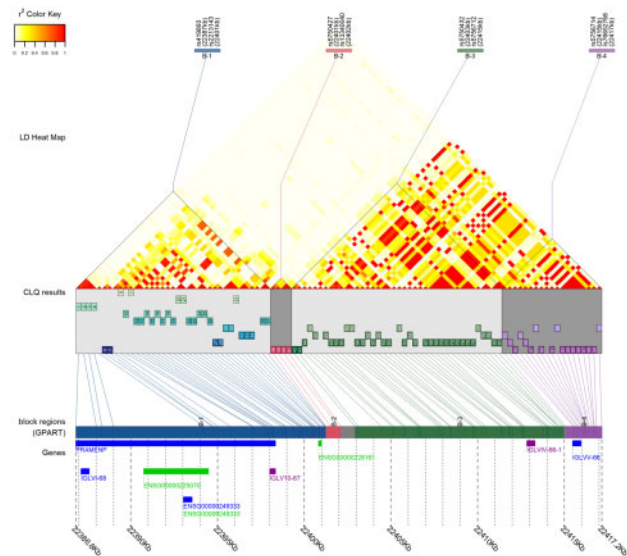

**Fig. 1.** Example plot produced by `LDblockHeatmap` function with GPART result (see [Supplementary Fig. S1](#) for detailed explanation of each component of the plot)

small blocks overlap with a gene region. Depending on whether the gene position information is used when combining small blocks, the LDblock-based method is divided into two methods: the only-block method (`onlyBlocks`) and the use-gene-region method (`useGeneRegions`). The algorithm is detailed in [Supplementary methods](#). Application of `GPART` to 1000 Genomes Project phase 3 data and a GWAS dataset (Roshandel et al., 2018) is reported in [Supplementary results](#) ([Supplementary Tables S6 and S7](#)).

### 2.3 LDblockheatmap: visualization function to show LD structure and gene positions

The `LDblockheatmap` function provides plotting capabilities to visualize the LD heatmap, LD block boundaries of Big-LD results or genomic sequence partitioning results of GPART, and physical location of LD blocks and genes ([Fig. 1](#)). The function displays gene regions when gene positions are provided and can draw a figure including up to 20 000 SNPs. See [Supplementary Figures S1–S3](#) for examples using various number of SNPs. For datasets with less than 200 SNPs, the LD bin structure obtained by the CLQ algorithm can be visualized ([Fig. 1](#) and [Supplementary Fig. S1](#)). The LD heatmap can also be visualized without Big-LD results or gene positions.

For various examples plotted by `LDblockHeatmap`, see the vignette of the package `gpart`.

## 3 Conclusion

In this paper, we introduce an R package, called `gpart`, which provides novel functions to cluster and partition a given genomic region by modeling the underlying LD structures of the SNPs as graphs. In addition, the package offers an efficient visualization function to display the obtained results with genomic information. The package `gpart` is available at Bioconductor.

## Funding

This work was supported by the National Research Foundation of Korea (NRF) [NRF-2018R1A2B6008016]; the Canadian Institutes of Health Research (CIHR) [Operating/Projects MOP-84287 & PJT 159463]; the Canadian Statistical Sciences Institute; and the Canadian Institutes of Health

Research Strategic Training for Advanced Genetic Epidemiology (CIHR STAGE) [GET-101831].

*Conflict of Interest:* none declared.

## References

- Barrett, J.C. (2005) Haploview: analysis and visualization of LD and haplotype maps. *Bioinformatics*, **21**, 263–265.
- Gabriel, S.B. *et al.* (2002) The structure of haplotype blocks in the human genome. *Science*, **296**, 2225–2229.
- Kilpinen, H. and Barrett, J.C. (2013) How next-generation sequencing is transforming complex disease genetics. *Trends Genet.*, **29**, 23–30.
- Kim, S.A. *et al.* (2018) A new haplotype block detection method for dense genome sequencing data based on interval graph modeling of clusters of highly correlated SNPs. *Bioinformatics*, **34**, 388–397.
- Pattaro, C. *et al.* (2008) Haplotype block partitioning as a tool for dimensionality reduction in SNP association studies. *BMC Genomics*, **9**, 405.
- Roshandel, D. *et al.* (2018) Meta-genome-wide association studies identify a locus on chromosome 1 and multiple variants in the MHC region for serum C-peptide in type 1 diabetes. *Diabetologia*, **61**, 1098–1111.
- Taliun, D. *et al.* (2014) Efficient haplotype block recognition of very long and dense genetic sequences. *BMC Bioinf.*, **15**, 10.
- Taliun, D. *et al.* (2016) Fast sampling-based whole-genome haplotype block recognition. *IEEE/ACM Trans. Comput. Biol. Bioinf.*, **13**, 315–325.
- Wang, N. *et al.* (2002) Distribution of recombination crossovers and the origin of haplotype blocks: the interplay of population history, recombination, and mutation. *Am. J. Hum. Genet.*, **71**, 1227–1234.
- Zhang, K. *et al.* (2002) A dynamic programming algorithm for haplotype block partitioning. *Proc. Natl Acad. Sci. USA*, **99**, 7335–7339.
- Zhang, K. and Jin, L. (2003) HaploBlockFinder: haplotype block analyses. *Bioinformatics*, **19**, 1300–1301.
